# Supplementary material for: Inclusion of Cross-Linked Elastin in Gelatin/PEG Hydrogels Favourably Influences Fibroblast Phenotype
Source: PubMed Central journal article supplement (PMC7183321; doi:10.3390/polym12030670), 2020-03-17
Supplement: polymers-12-00670-s001.pdf [file polymers-12-00670-s001.pdf]

**Collagen I A**

**Elastin**

**Gelatin-PEG**

0 μm 250

0 μm 250

**GPE control**

0 μm 250

0 μm 250

**GEP 30**

0 μm 250

0 μm 250

**GEP 45**

0 μm 250

0 μm 250

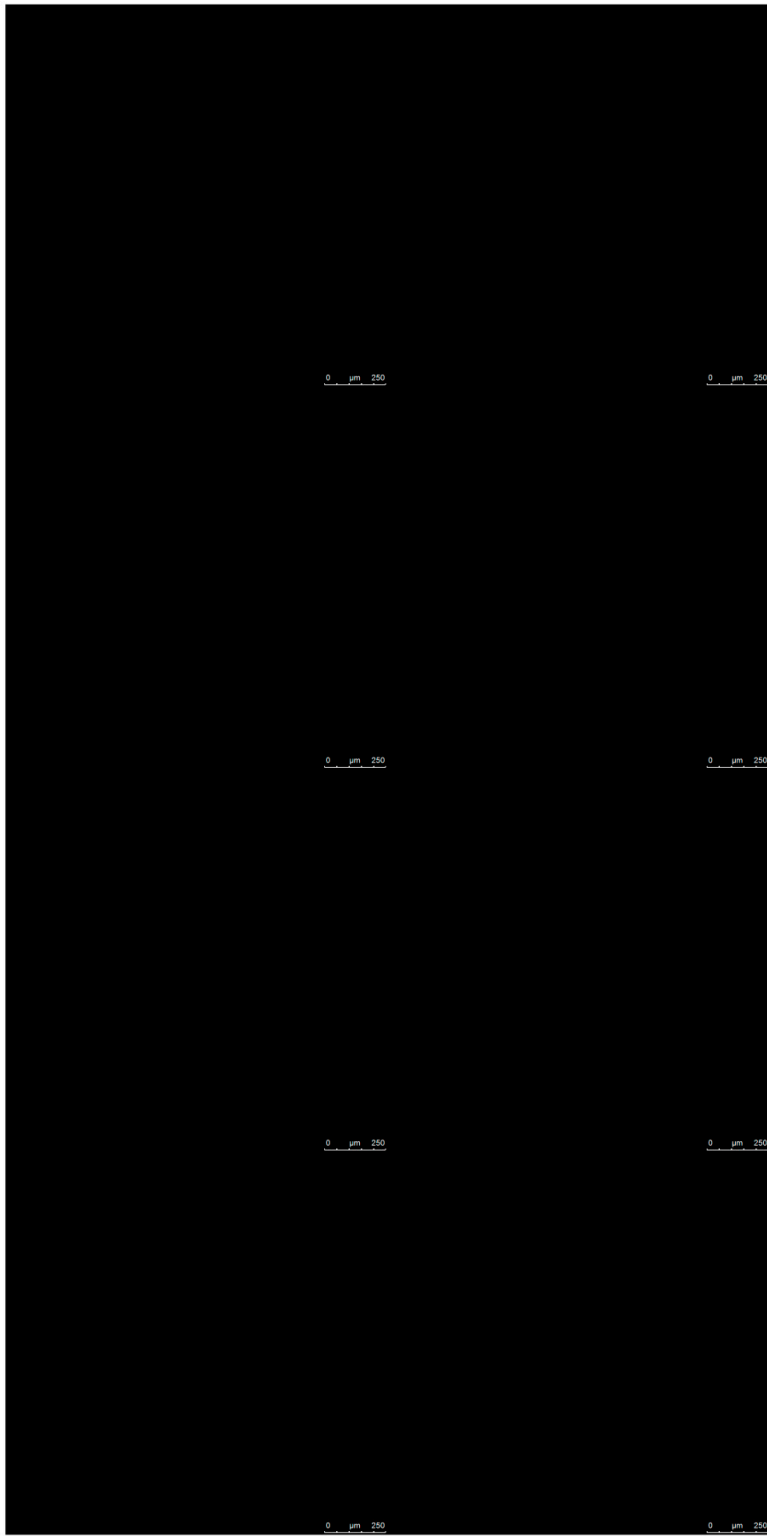

**Figure S1.** Immunofluorescence staining for elastin (green) and collagen type I A (yellow) in cell free GEP45, GEP30 and GPE control. Scale bar=250 $\mu$ m. Cell-free hydrogels have been stained the same as the cell encapsulated samples as negative controls. Above images proved that cell-free samples did not contribute to the staining results in Figure 7A.

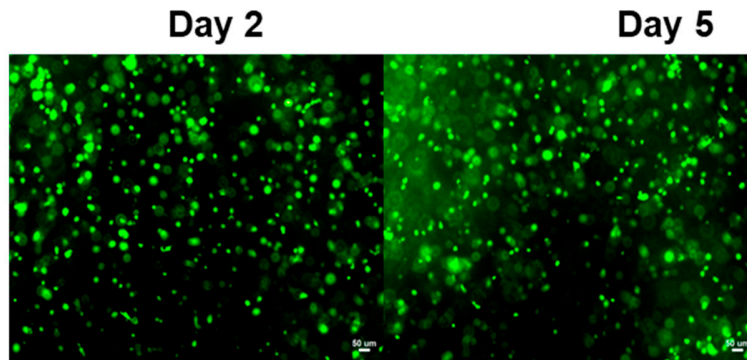

**Figure S2.** NHDFs were encapsulated into elastin-PEG hydrogel (no gelatin-PEG-acrylate or PEGDA). The cells were stained by Calcein AM at day 2 and day 5. Scale bar=50 $\mu$ m.
